# Supplementary material for: Phytochemicals Determination, and Antioxidant, Antimicrobial, Anti-Inflammatory and Anticancer Activities of Blackberry Fruits
Source: MDPI journal article supplement (doi:10.3390/foods12071505), 2023-04-03
Supplement: s1 [file s1]

**Table S1.** Calibration ranges, curves, regression coefficients and LOD and LOQ of the standard molecules

| Standards          | Calibration Ranges (µg/mL) | Calibration Curves (µg/mL) | R2     | LOD (µg/mL) | LOQ (µg/mL) |
|--------------------|----------------------------|----------------------------|--------|-------------|-------------|
| Chlorogenic acid   | 5.78-185.00                | $y=49.157x-227.23$         | 0.9918 | 0.03        | 0.09        |
| Ferulic acid       | 5.31-170.00                | $y=22.075x-65$             | 0.9994 | 0.05        | 0.16        |
| Rutin              | 5.15-165.00                | $y=549.78x+1547.8$         | 0.9981 | 0.04        | 0.12        |
| Catechin           | 4.43-140.00                | $y=434.59x-3192.2$         | 0.9977 | 0.04        | 0.14        |
| Quercetin          | 5.31-170.00                | $y=101.89x-461.56$         | 0.9967 | 0.03        | 0.10        |
| Cyanidin-glucoside | 2.85-200.00                | $y=51.349x+1.09$           | 0.9989 | 0.006       | 0.02        |
